# Supplementary material for: Cell stress and phase separation stabilize the monomeric state of pseudoisocyanine chloride employed as a self-assembly crowding sensor
Source: PubMed Central journal article supplement (PMC11458801; doi:10.1038/s42004-024-01315-y), 2024-10-07
Supplement: 42004_2024_1315_MOESM3_ESM.pdf [file 42004_2024_1315_MOESM3_ESM.pdf]

# Description of Additional Supplementary Files

**File name:** Supplementary Data 1

**Description:** Raw data for fluorescence spectra presented in figures 2b-c, 4 and Supplementary figures 2, 3, 4, 5,6 and 9 as well as the absorption spectra in supplementary figure 1
